# Supplementary material for: Self-assembled π-conjugated organic nanoplates: from hexagonal to triangular motifs
Source: Royal Society of Chemistry journal article supplement (doi:10.1039/c6ra06431k), 2016-01-01
Supplement: c6ra06431k1.pdf [file c6ra06431k1.pdf]

## Self-assembled $\pi$ -conjugated organic nanoplates: from hexagonal to triangular motifs.

Daniel E. Martínez-Tong, Gabin Gbabode, Christian Ruzié, Basab Chattopadhyay, Guillaume Schweicher, Alan R. Kennedy, Yves H. Geerts, Michele Sferrazza

### \*\*\*SUPPLEMENTARY MATERIAL\*\*\*

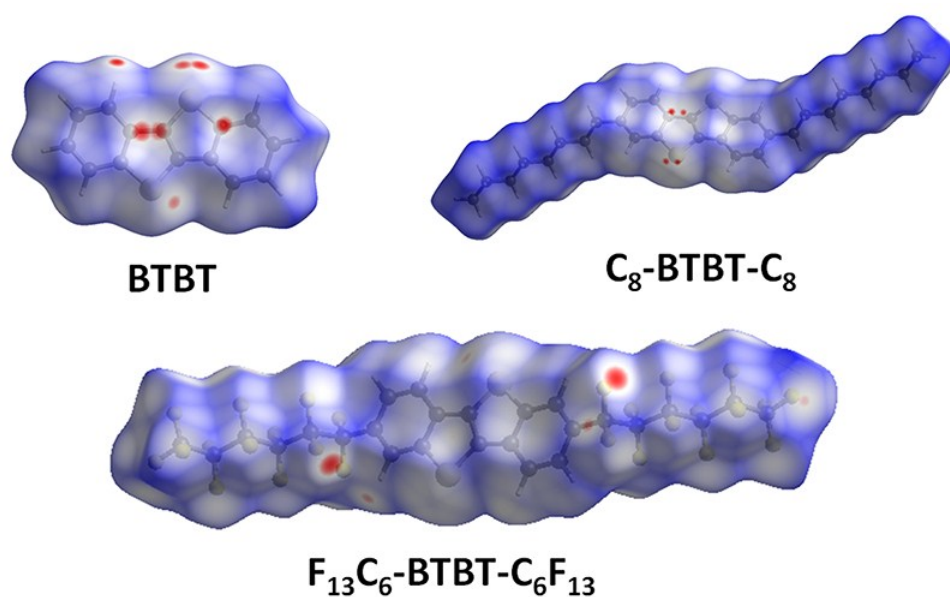

**Figure S1.** Hirshfeld surfaces for BTBT, C<sub>8</sub>-BTBT-C<sub>8</sub> and F<sub>13</sub>C<sub>6</sub>-BTBT-C<sub>6</sub>F<sub>13</sub> mapped over a  $d_{\text{norm}}$  range of -0.5- 1.5Å.

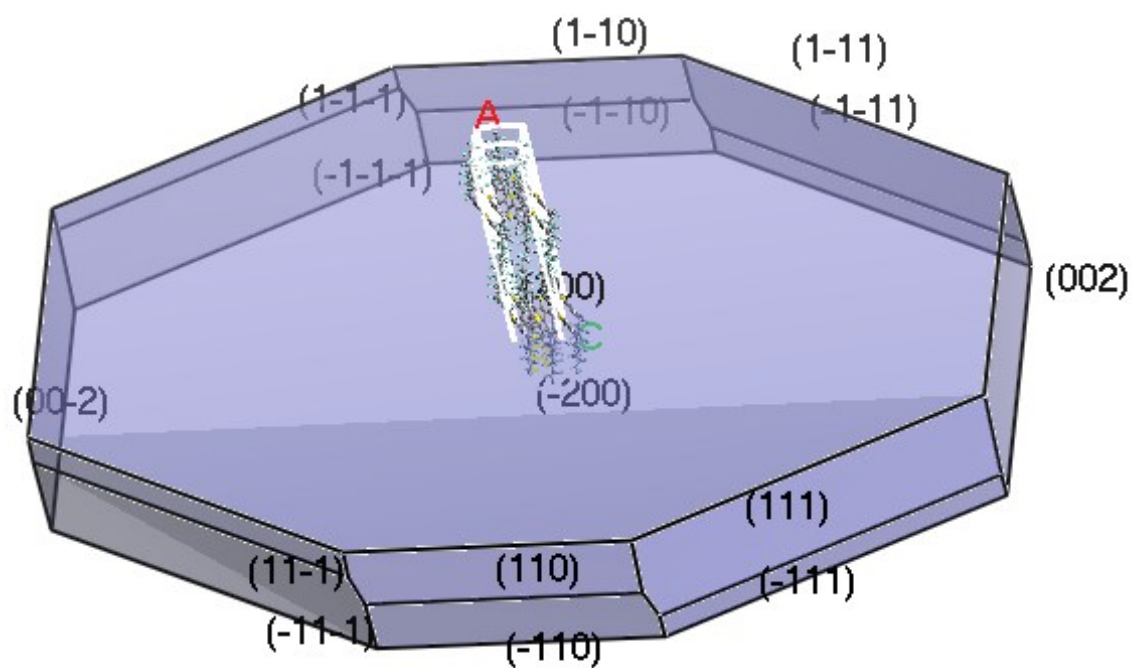

**Figure S2.** Calculated morphology of the crystal motif.

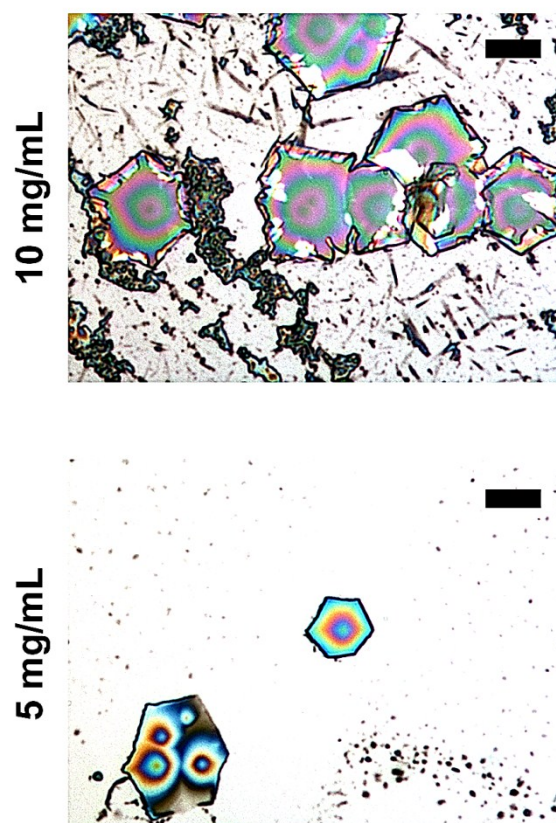

**Figure S3.** Optical microscopy image of the nanoplates showing interference patterns. Black bar represents 20  $\mu\text{m}$ .
